# Supplementary material for: Intrapulmonary administration of purified NEIL2 abrogates NF-κB–mediated inflammation
Source: PubMed Central journal article supplement (PMC8164026; doi:10.1016/j.jbc.2021.100723), 2021-04-28
Supplement: mmc1.pdf [file mmc1.pdf]

## **Intrapulmonary administration of purified NEIL2 abrogates NF- $\kappa$ B-mediated inflammation**

Nisha Tapryal<sup>1</sup>, Shandy Shahabi<sup>2</sup>, Anirban Chakraborty<sup>1</sup>, Koa Hosoki<sup>1,3</sup>, Maki Wakamiya<sup>4</sup>, Gobinda Sarkar<sup>5,6</sup>, Gulshan Sharma<sup>1</sup>, Victor J. Cardenas<sup>1</sup>, Istvan Boldogh<sup>7</sup>, Sanjiv Sur<sup>1,3</sup>, Gourisankar Ghosh<sup>2</sup>, and Tapas K. Hazra<sup>1\*</sup>

### **List of Supporting Material**

1. Table S1
2. Table S2
3. Figure S1-S7

**Table S1.** List of primers used in qPCR assays.

| <b>Exon Primers</b>     | <b>Sequence</b>              |
|-------------------------|------------------------------|
| mCxcl1-exon-For         | 5' CCTATCGCCAATGAGCTGC 3'    |
| mCxcl1-exon-Rev         | 5' ACTTGGGGACACCTTTTAGC 3'   |
| mCxcl2-exon-For         | 5' CACCAACCACCAGGCTACA 3'    |
| mCxcl2-exon-Rev         | 5' GGATGATTTTCTGAACCAGGGG 3' |
| mCxcl10-exon-For        | 5' GATCCCTCTCGCAAGGACG 3'    |
| mCxcl10-exon-Rev        | 5' TCAACACGTGGGCAGGATAG 3'   |
| mIl6-exon-For           | 5' GTCCTTCCTACCCCAATTTCCA 3' |
| mIl6-exon-Rev           | 5' AGGTTTGCCGAGTAGATCTCAA 3' |
| mTnf $\alpha$ -exon-For | 5' AAATGGTTCGTACAGCAGCG 3'   |
| mTnf $\alpha$ -exon-Rev | 5' GCACGGAAGTAGTCTCCACG 3'   |
| mIL1 $\beta$ -exon-For  | 5' CATCAGCACCTCACAAGCAG 3'   |
| mIL1 $\beta$ -exon-Rev  | 5' TAAGTGGTTGCCCATCAGAGG 3'  |
| mGapdh-exon-For         | 5' GTCACCAGGGCTGCCATTTG 3'   |
| mGapdh-exon-Rev         | 5' GATGTTAGTGGGGTCTCGCT 3'   |
| <b>Promoter Primers</b> | <b>Sequences</b>             |
| mCxcl1-Pro-For          | 5' ATCCTTGGGAGTGGAGCAAG 3'   |
| mCxcl1-Pro-Rev          | 5' GGAGTCTGGAGTGCTGGAAC 3'   |
| mCxcl2-Pro-For          | 5' AGCGCAGACATCACTTCCTT 3'   |
| mCxcl2-Pro-Rev          | 5' TGAAGTGTGGCTGGAGTCTG 3'   |
| mCxcl10-Pro-For         | 5' GCTCACGCTTTGGAAAGTGAA 3'  |
| mCxcl10-Pro-Rev         | 5' ATGTCTCTCAGCGGTGGATG 3'   |
| mIl6-Pro-For            | 5' CCCACCCTCCAACAAAGATT 3'   |
| mIl6-Pro-Rev            | 5' CAGAGAGGAACTTCATAGCGGT 3' |
| mTNF $\alpha$ -Pro-For  | 5' TCTCAAGCTGCTCTGCCTTC 3'   |
| mTNF $\alpha$ -Pro-Rev  | 5' GACCATGCCTGTGTCTATTTCC 3' |

**Table S2.** List of the mouse DNA oligonucleotides used in EMSA analysis. For clarity, the NF- $\kappa$ B motif sequences are shown in red and bases marked in blue represent the alterations in sequence to generate mutation.

| DNA Oligos        | Label            | Duplex Sequence                                                                                                                                                                |
|-------------------|------------------|--------------------------------------------------------------------------------------------------------------------------------------------------------------------------------|
| mCxcl1-WT         | C1-WT<br>(Cxcl1) | <p style="text-align: center;"><b>NF-<math>\kappa</math>B Motif</b></p> 5' GAAACACCCTGTACTCCGGGAATTTCCCTGGCCCGGAGCTCTG 3'<br>3' ATTTGTGGGACATGAGGCCCTTAAAGGGACCGGGCCTCGAGAC 5' |
| mCxcl1-Mutant     | C1-M             | 5' GAAACACCCTGTACTCCGAAAAGGTCCCTGGCCCGGAGCTCTG 3'<br>3' CTTTGTGGGACATGAGGCTTTTCCAGGGACCGGGCCTCGAGAC 5'                                                                         |
| mCxcl2-WT         | C2-WT<br>(Cxcl2) | <p style="text-align: center;"><b>NF-<math>\kappa</math>B Motif</b></p> 5' GGACCCTGAGCTCAGGGAATTTCCCTGGTCCCCGGGCT 3'<br>3' CCTGGGACTCGAGTCCCTTAAAGGGACCAGGGGCCCGA 5'           |
| mCxcl2-Mutant     | C2-M             | 5' GGACCCTGAGCTCAGAAAAGGTCCCTGGTCCACGGGCT 3'<br>3' CCTGGGACTCGAGTCTTTTCCAGGGACCAGGTGCCCGA 5'                                                                                   |
| mIl6-WT           | IL6-WT<br>(Il6)  | <p style="text-align: center;"><b>NF-<math>\kappa</math>B Motif</b></p> 5' TTTTATCAAATGTGGGATTTTCCCATGAGTCTCAAAA 3'<br>3' AAAAAATAGTTTACACCCTAAAAGGGTACTCAGAGTTTT 5'           |
| mIl6-Mutant       | IL6-M            | 5' TTGCTATTAAATGTGTTCTGTTTGTACAGAGTCTCAAAA 3'<br>3' AACGATAATTTACACAAGCAAAACATGTCTCAGAGTTTT 5'                                                                                 |
| mTnf $\alpha$ -WT | Tnf $\alpha$     | <p style="text-align: center;"><b>NF-<math>\kappa</math>B Motif</b></p> 5' AAGAACTCAAACAGGGGGCTTTCCCTCCTCAATATCAT 3'<br>3' TTCTTGAGTTTGTCCTCCGAAAGGGAGGAGTTATAGTA 5'           |

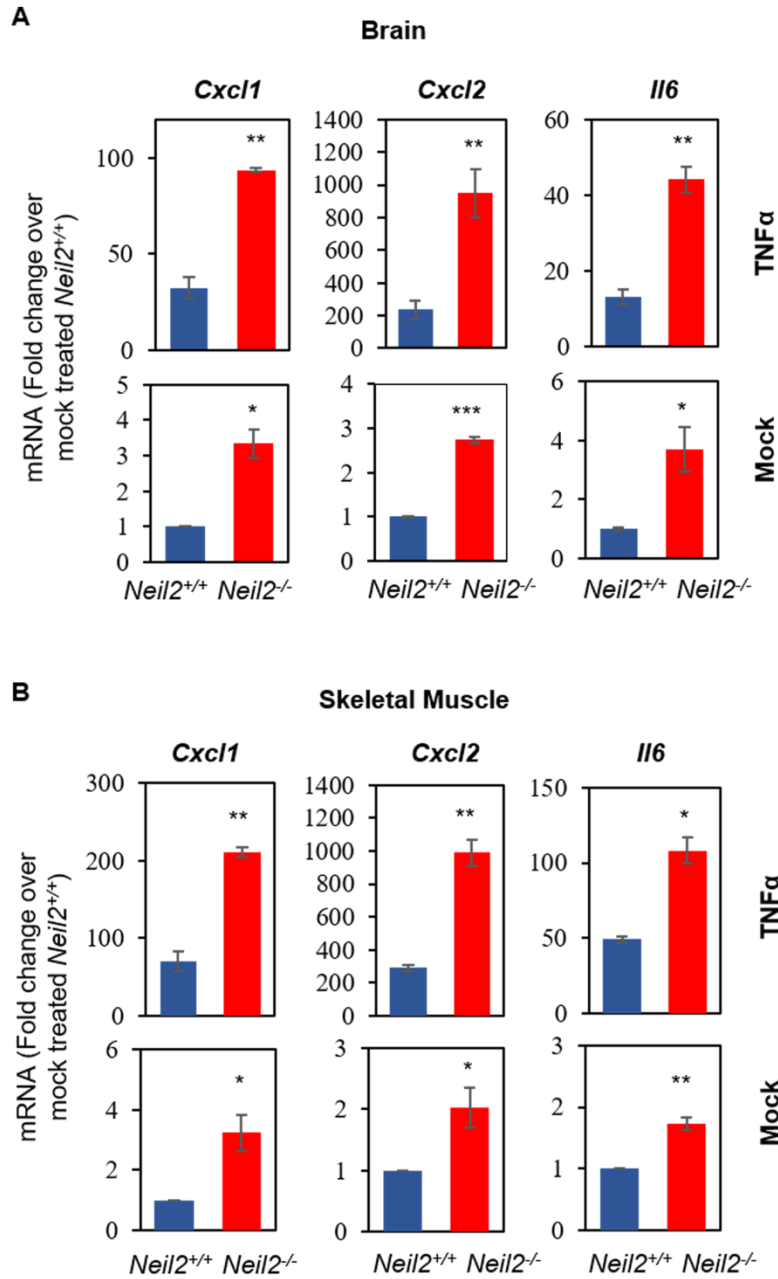

**Figure. S1. Systemic inflammation in brain and skeletal muscle of *Neil2*<sup>-/-</sup> vs. *Neil2*<sup>+/+</sup> mice.**

(A and B) Real-Time quantitative reverse transcription polymerase chain reaction analysis with total RNA isolated from brain (A) and skeletal muscles (B) of mock- (lower panel) or TNF $\alpha$ -treated (upper panel) (intraperitoneal) *Neil2*<sup>+/+</sup> or *Neil2*<sup>-/-</sup> mice relative to mock-treated *Neil2*<sup>+/+</sup> groups. Results are normalized to *Gapdh*. Error bars represent  $\pm$  standard deviation from the mean. n=2 independent experiments from samples prepared by pooling tissues from n=3 mice per group. \*= $P$ <0.05; \*\*= $P$ <0.01; \*\*\*= $P$ <0.005 vs. *Neil2*<sup>+/+</sup> groups.

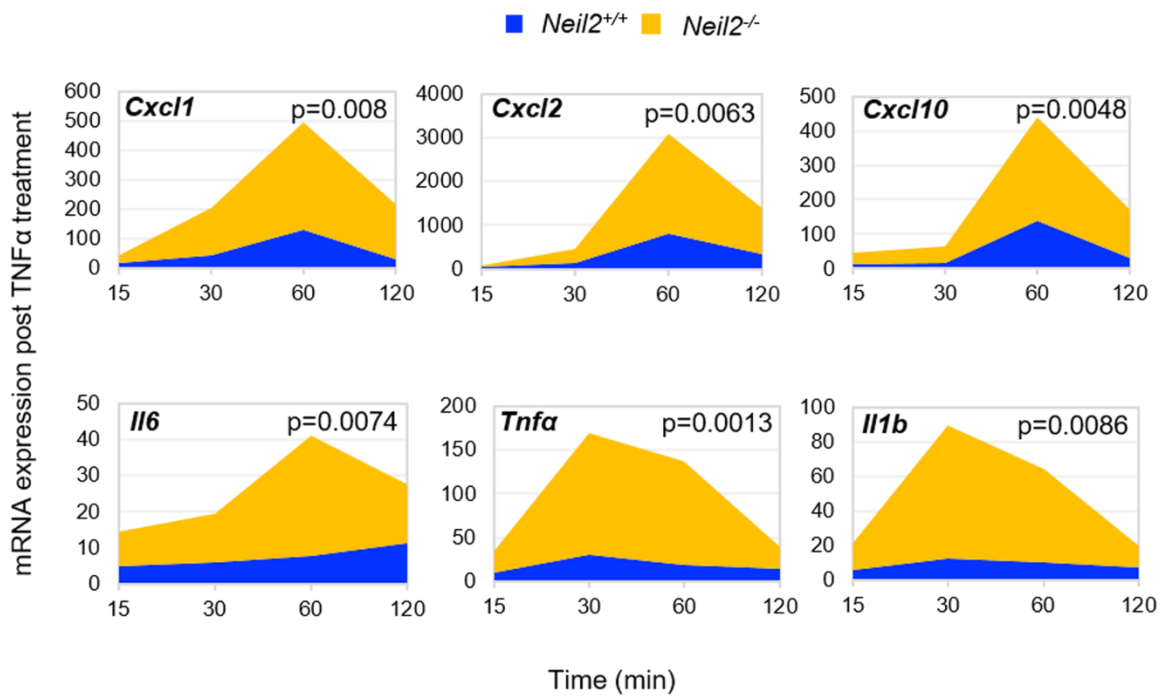

**Figure. S2. TNF $\alpha$ -induced inflammatory gene expression in the lungs of *Neil2*<sup>-/-</sup> vs. *Neil2*<sup>+/+</sup> mice.** Area plot displays mRNA expression of *Cxcl1*, *Cxcl2*, *Cxcl10*, *Il6*, *Tnfa* and *Il1 $\beta$*  in *Neil2*<sup>+/+</sup> or *Neil2*<sup>-/-</sup> mice lung at 15-, 30-, 60- and 120-min post TNF $\alpha$  intranasal treatment as analyzed by Real-Time quantitative reverse transcription polymerase chain reaction analysis. Results are normalized to *Gapdh* expression and mock-treated *Neil2*<sup>+/+</sup> groups; n=2 independent experiments, with data collected from n=4 mice per group; p-values for *Neil2*<sup>-/-</sup> vs. *Neil2*<sup>+/+</sup> groups are shown.

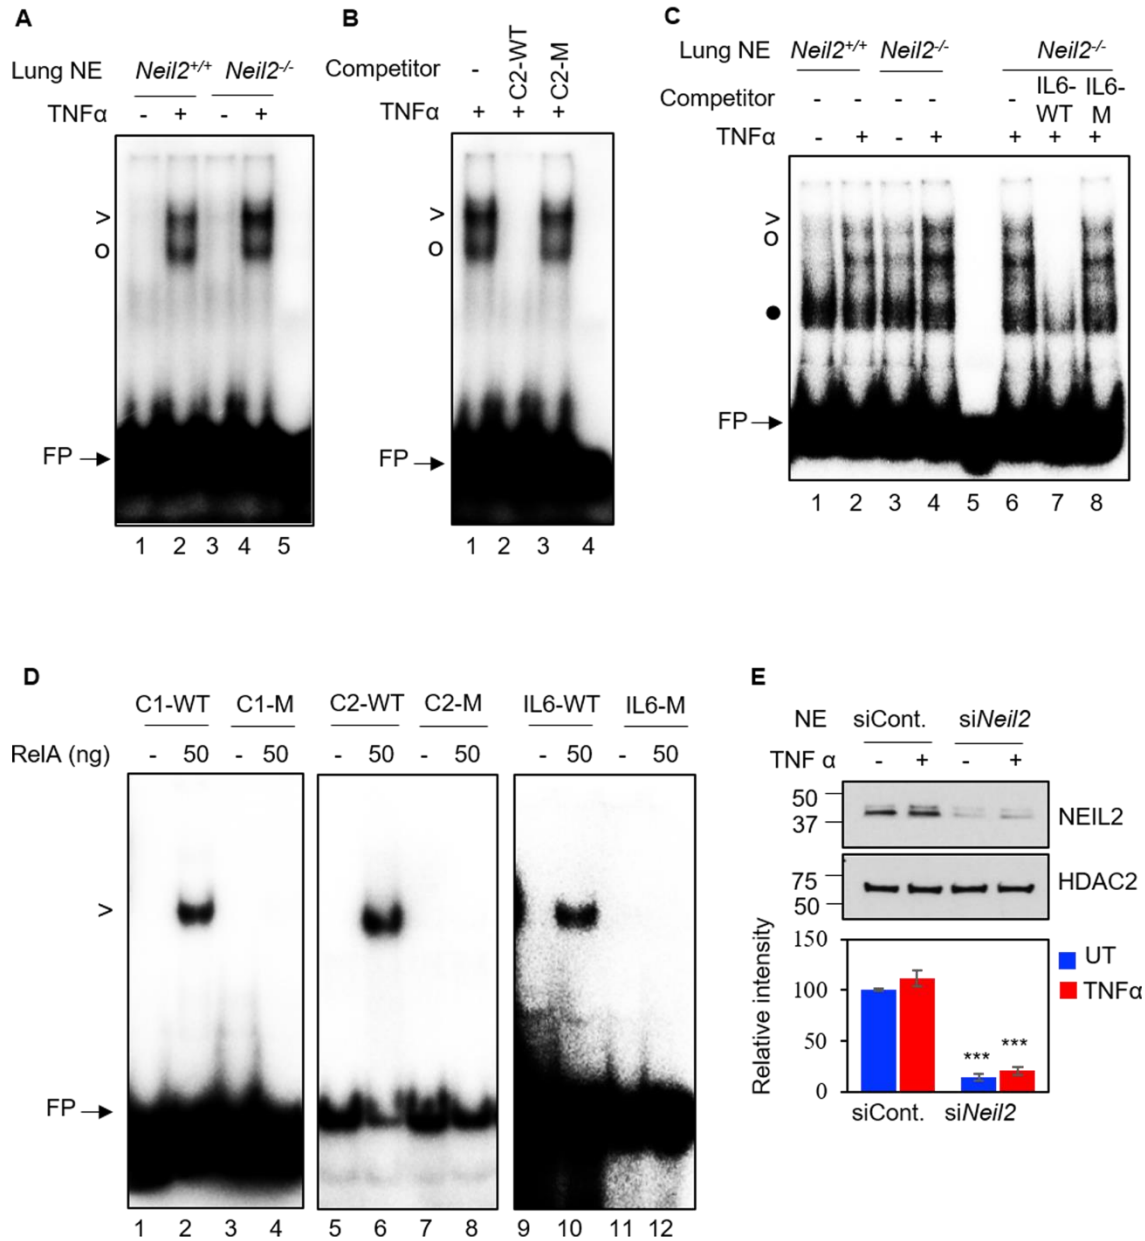

**Figure. S3. Electrophoretic mobility-shift assays (EMSAs) of NF-κB's binding to its cognate motif derived from target gene promoters.**

(A-C) EMSA using nuclear extracts (NEs) from mock- or TNFα-treated intranasally *Neil2*<sup>+/+</sup> or *Neil2*<sup>-/-</sup> male mice lung (pooled, n=3) with <sup>32</sup>P-labeled probe containing wild-type κB-motif from mouse *Cxcl2* (C2-WT, A and B) and *Il6*- promoter (IL6-WT, C); competition analysis in B, lanes 1-3, and in C, lanes 6-8 with 100-fold molar excess of wild-type or mutant competitor as indicated. (D) EMSAs of recombinant RelA protein complex using <sup>32</sup>P-labeled wild-type C1-WT, C2-WT and IL6-WT or mutant C1-M, C2-M and IL6-M NF-κB-motifs; Lanes 1, 3, 5, 7, 9 and 11 show 'probe only' lanes. (E)

Immunoblot of NEIL2 in nuclear extracts (NEs) from untreated (-) or TNF $\alpha$ -treated (+) MLE12 cells transfected with control siRNA (*siCont.*) or NEIL2-specific siRNA (*siNeil2*). HDAC2 was used as loading control; Quantification shows NEIL2 band intensities normalized to HDAC2 and represented relative to untreated *siCont.* group arbitrarily taken as 100. Representative data images from three independent experiments are shown. > and  $\circ$  denote RelA-DNA complexes;  $\bullet$  denotes nonspecific complex; FP represents free probe. Error bars represent  $\pm$  standard deviation from the mean. n=3 independent experiments. \*\*\*= $P < 0.005$  vs. *siCont.* groups.

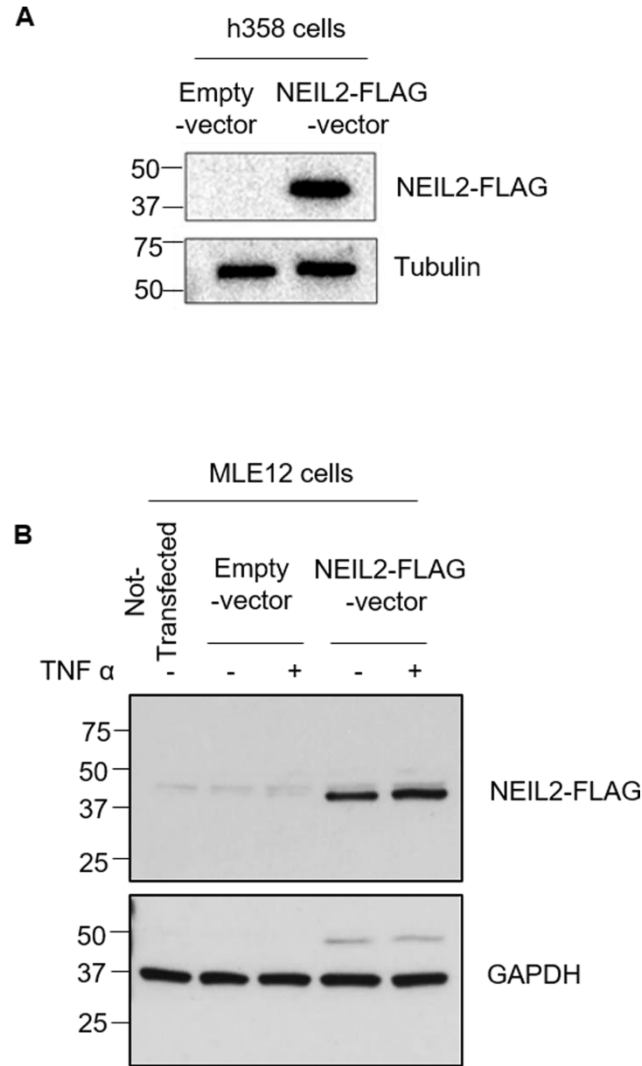

**Figure. S4. NEIL2 overexpression in human and mouse cell lines.**

(A) Immunoblot of cell extracts from h358 cells expressing control (Empty)- or NEIL2-FLAG-vectors, using anti -FLAG or -Tubulin antibodies. (B) Immunoblot of cell extracts from untreated (-) or TNF $\alpha$ -treated (+) MLE12 cells transfected with control or NEIL2-FLAG vectors, using anti -FLAG or -GAPDH antibodies. Un-transfected/untreated MLE12 cell extract was loaded as negative control. Representative data images from two independent experiments are shown.



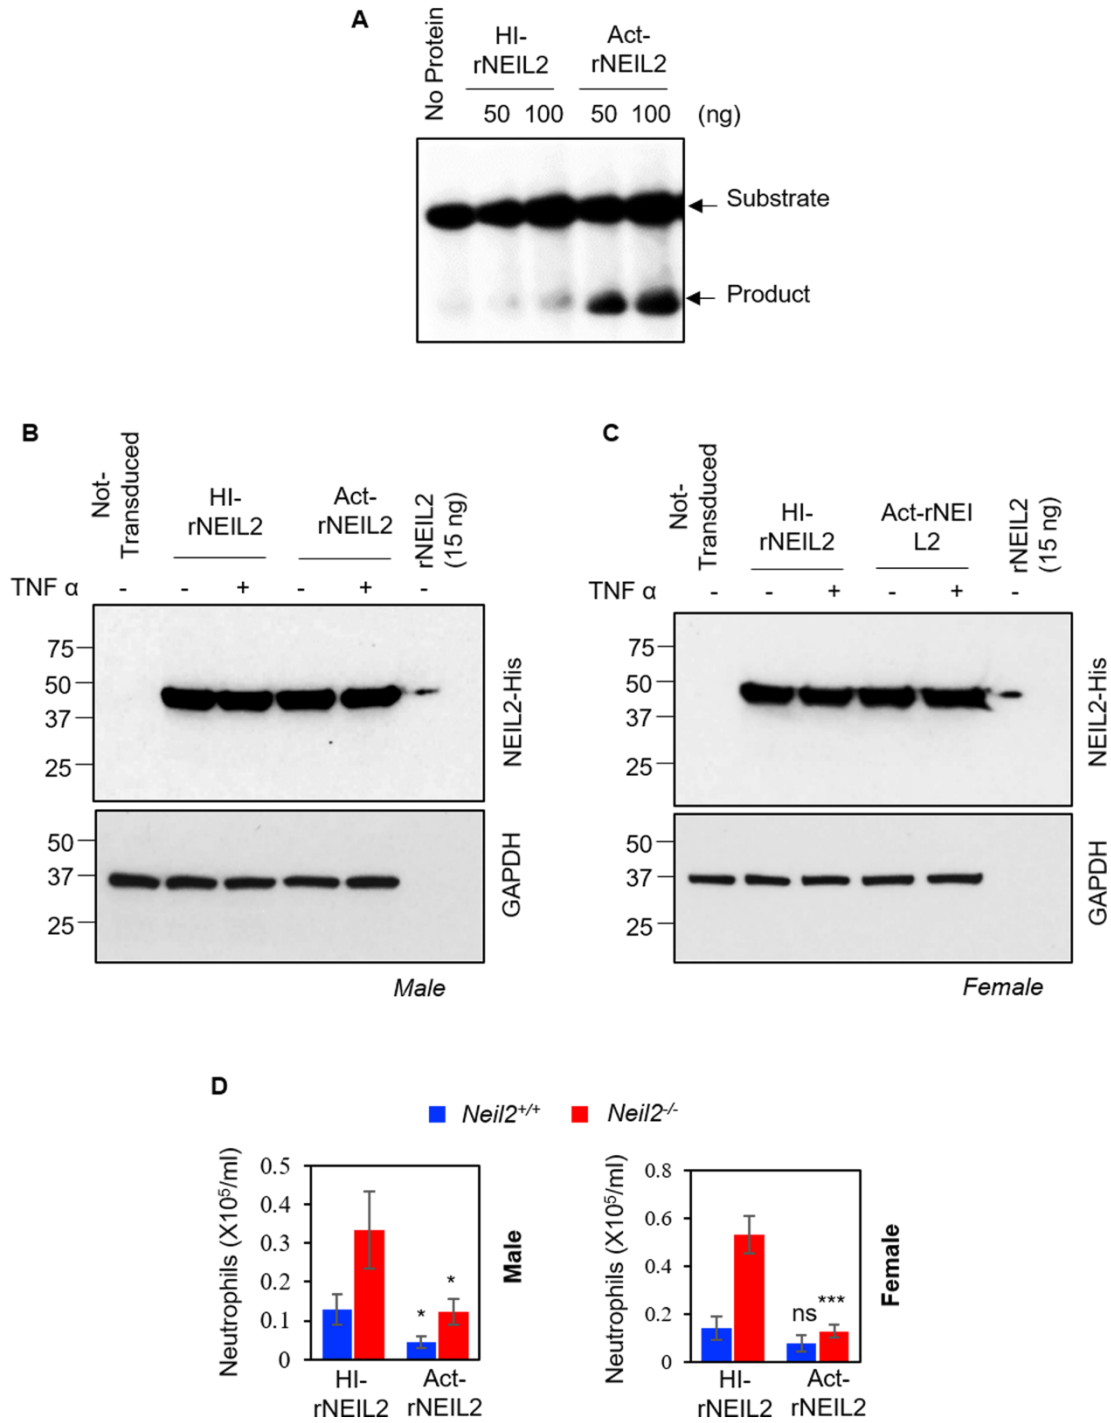

**Figure. S5. Intrapulmonary rNEIL2 delivery in  $Neil2^{+/+}$  or  $Neil2^{-/-}$  male and female mice.**

(A) Analysis of glycosylase activity of HI-rNEIL2 or Act-rNEIL2 with  $^{32}P$ -labeled 5-hydroxyuracil DNA-bubble substrate (51-mer). The substrate and the cleaved 25-mer product are indicated by arrows. (B and C) Immunoblots of whole cell extracts from  $-/+TNF\alpha$  treated  $Neil2^{+/+}$  male (B) or female (C) mice lung,

72 h post-transduction with HI-rNEIL2 or Act-rNEIL2 using anti-His and GAPDH antibodies. Act-rNEIL2 protein (15 ng) was loaded as positive control. **(D)** Neutrophil counts post 16 h mock-challenge in broncho-alveolar lavage fluid of *Neil2*<sup>+/+</sup>/*Neil2*<sup>-/-</sup> male and female mice lung transduced with HI-rNEIL2 or Act-rNEIL2. Error bars represent  $\pm$  standard deviation from the mean (n=3). ns= not significant; \*= $p < 0.05$ ; \*\*= $p < 0.01$ ; \*\*\*= $p < 0.005$  vs. HI-rNEIL2 transduced group.

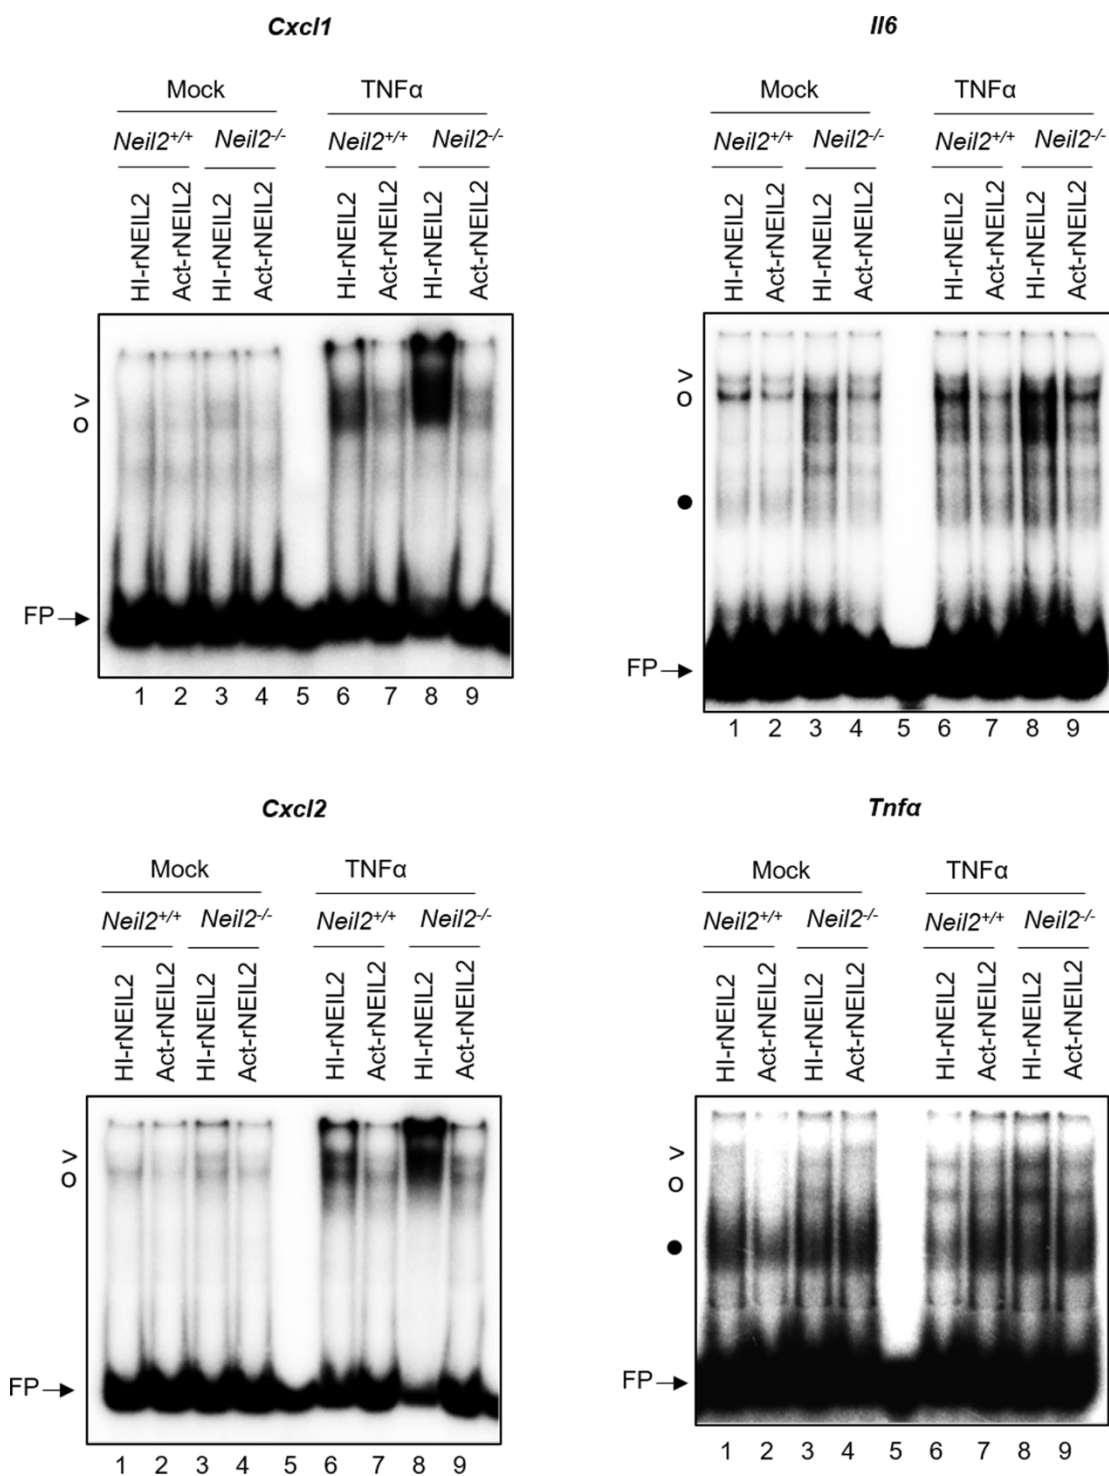

**Figure. S6. Electrophoretic mobility-shift assays (EMSA) with lung nuclear extract from *Neil2*<sup>+/+</sup> or *Neil2*<sup>-/-</sup> male mice.**

Full size EMSA images for Figure 5E are displayed here. EMSAs of NF-κB binding using nuclear extracts pooled from *Neil2*<sup>+/+</sup>/*Neil2*<sup>-/-</sup> male mice lung (n=3), transduced with HI-rNEIL2 or Act-rNEIL2 prior to

mock/TNF $\alpha$ -exposure, with radiolabeled probes derived from *Cxcl1*, *Cxcl2*, *IL6* and *Tnfa* promoters as indicated on the top; Representatives of three independent gels are shown; > and <sup>o</sup> denote RelA-DNA complexes; ● denotes nonspecific complex; FP represents free probe. lane 5: probe only.

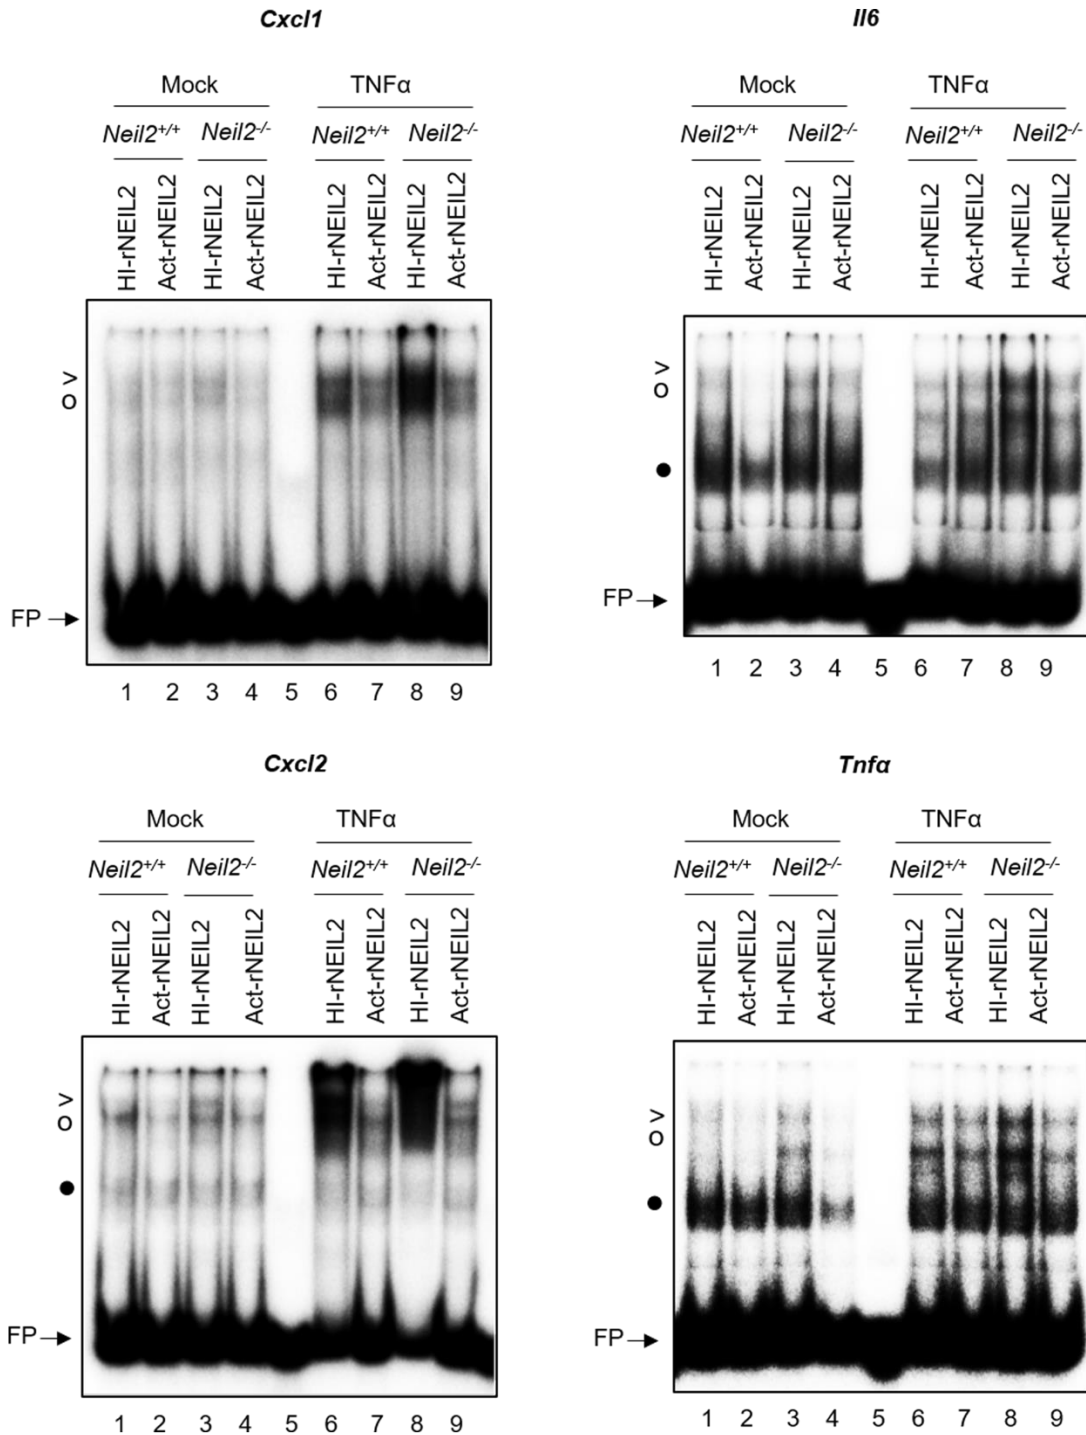

**Figure. S7. Electrophoretic mobility-shift assays (EMSAs) with lung nuclear extract from *Neil2*<sup>+/+</sup> or *Neil2*<sup>-/-</sup> female mice.**

EMSA of NF-κB binding using nuclear extracts pooled from *Neil2*<sup>+/+</sup>/*Neil2*<sup>-/-</sup> female mice lung (n=3), transduced with HI-rNEIL2 or Act-rNEIL2 prior to mock/TNFα-exposure, with radiolabeled probes

derived from *Cxcl1*, *Cxcl2*, *IL6* and *Tnfa* promoters as indicated on the top; Representatives of three independent gels are shown; > and <sup>o</sup> denote RelA-DNA complexes; ● denotes nonspecific complex; FP represents free probe. lane 5: probe only.
